# Supplementary material for: High and Distinct Range-Edge Genetic Diversity despite Local Bottlenecks
Source: PubMed Central journal article supplement (PMC3744244; doi:10.1371/journal.pone.0068646), 2013-07-10
Supplement: pone.0068646.s001.pdf [file pone.0068646.s001.pdf]

Figure S1. Estimation of the most probable number of groups (K) based on Bayesian clustering for K = 1 to 8 and 25 runs each (STRUCTURE [43]). (A) Mean log-likelihood of the data per K, i.e. standard output from Structure. (B) Mean absolute difference of the second order rate of change with respect to K [44].

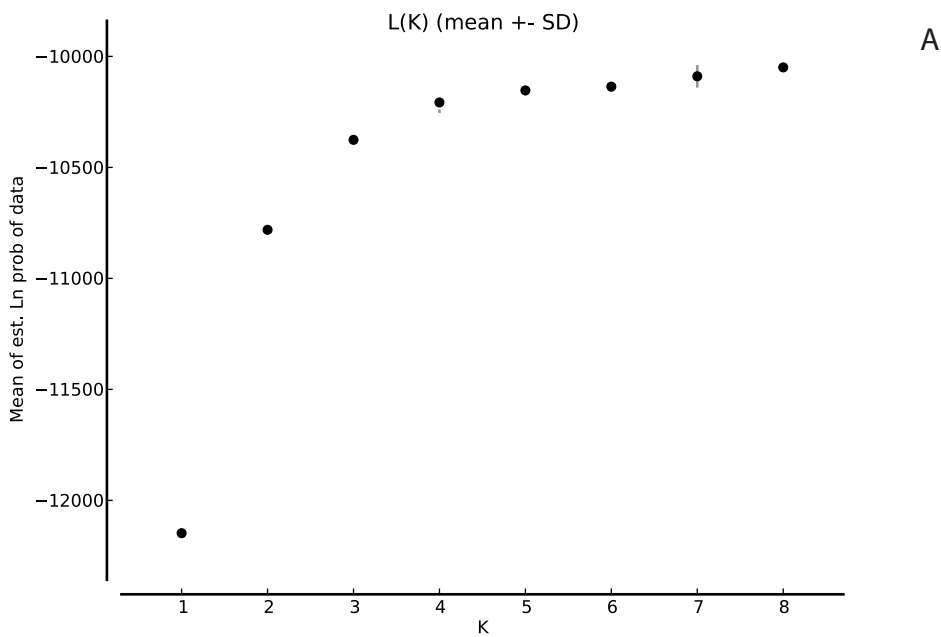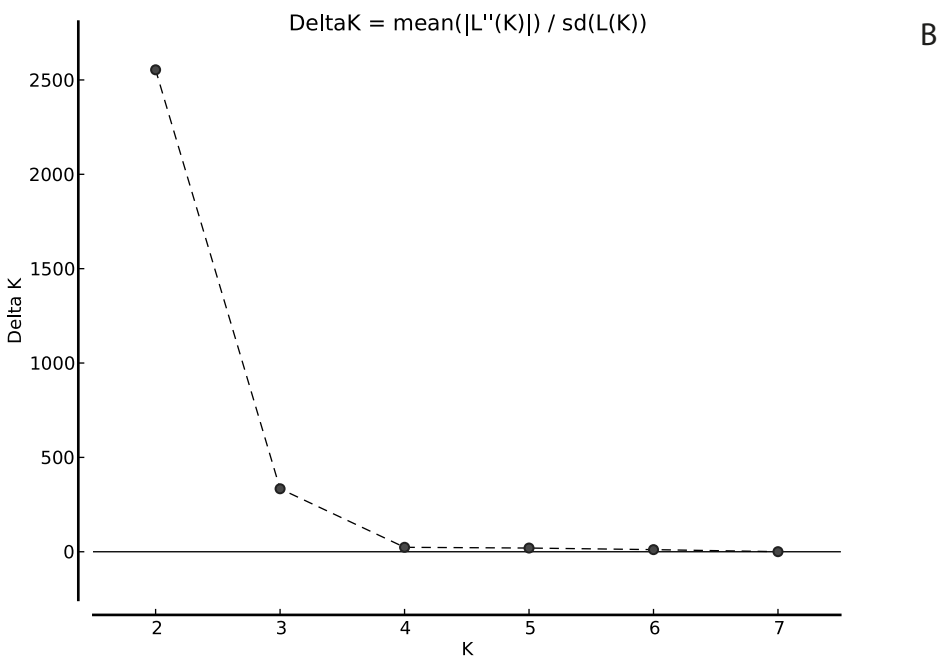

Evanno method output

| K | Reps | Mean LnP(K)  | Stdev LnP(K) | Ln'(K)      | Ln''(K)    | Delta K     |
|---|------|--------------|--------------|-------------|------------|-------------|
| 1 | 25   | -12147.73333 | 0.051640     | —           | —          | —           |
| 2 | 25   | -10781.18333 | 0.376386     | 1366.550000 | 961.183333 | 2553.714803 |
| 3 | 25   | -10375.81667 | 0.828050     | 405.366667  | 276.350000 | 333.735919  |
| 4 | 25   | -1.02468E+04 | 2.062038     | 129.016667  | 48.600000  | 23.568918   |
| 5 | 25   | -10166.38333 | 3.218333     | 80.416667   | 63.266667  | 19.658211   |
| 6 | 25   | -10149.23333 | 3.777654     | 17.150000   | 42.483333  | 11.245958   |
| 7 | 25   | -1.00896E+04 | 45.078909    | 59.633333   | 19.600000  | 0.434793    |
| 8 | 25   | -10049.56667 | 5.477834     | 40.033333   | —          | —           |
