# Supplementary material for: High and Distinct Range-Edge Genetic Diversity despite Local Bottlenecks
Source: PubMed Central journal article supplement (PMC3744244; doi:10.1371/journal.pone.0068646), 2013-07-10

Figure S3. Genetic differentiation of *S. polyschides* illustrated by a (A) neighbour-joining network of genotypes using Cavalli-Sforza & Edwards [47] pairwise distances. Numbers above the branches are Bayesian posterior probabilities ( $> 0.50$ ). Inferred groups are divided by dotted lines; and by (B) a Factorial Correspondence Analysis of population multiscores.

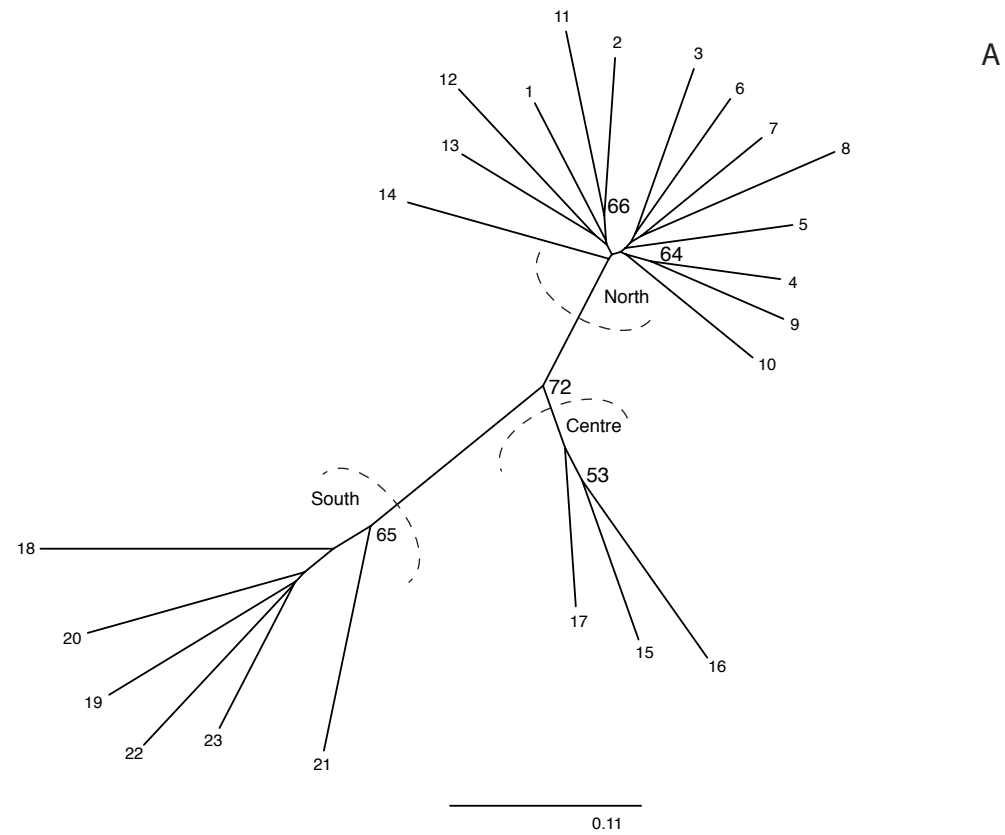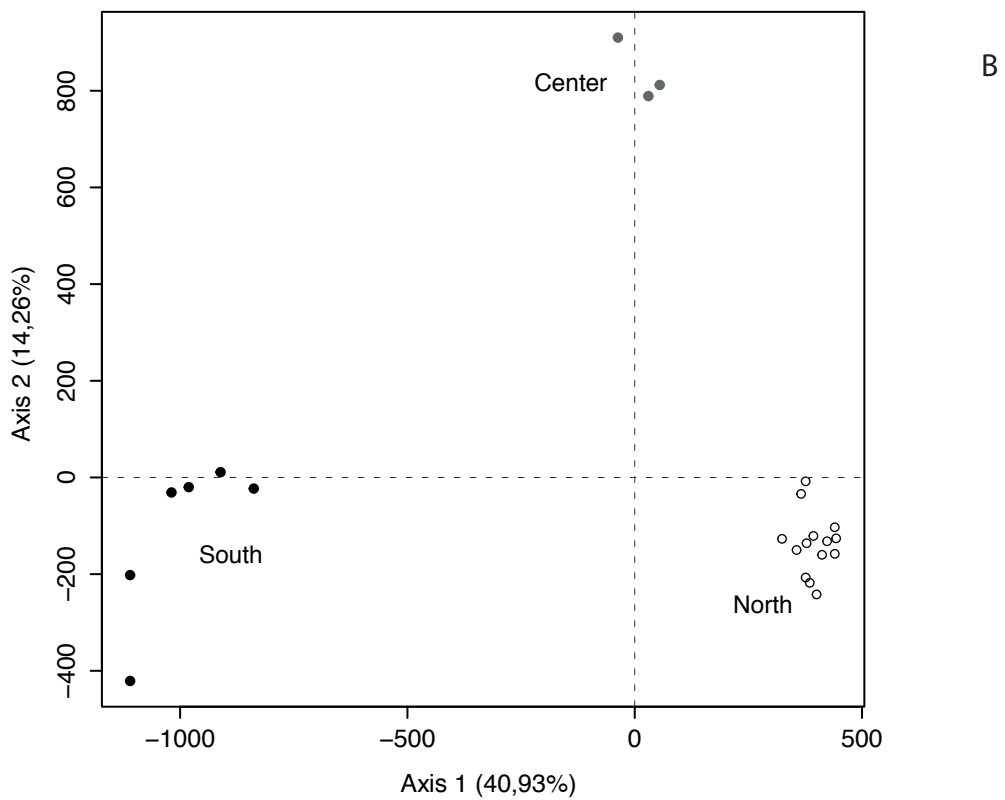

Supplement: pone.0068646.s003.pdf [file pone.0068646.s003.pdf]
